# Supplementary material for: The Association of Rpb4 with RNA Polymerase II Depends on CTD Ser5P Phosphatase Rtr1 and Influences mRNA Decay in Saccharomyces cerevisiae
Source: MDPI journal article supplement (doi:10.3390/ijms23042002), 2022-02-11
Supplement: s1 [file s1]

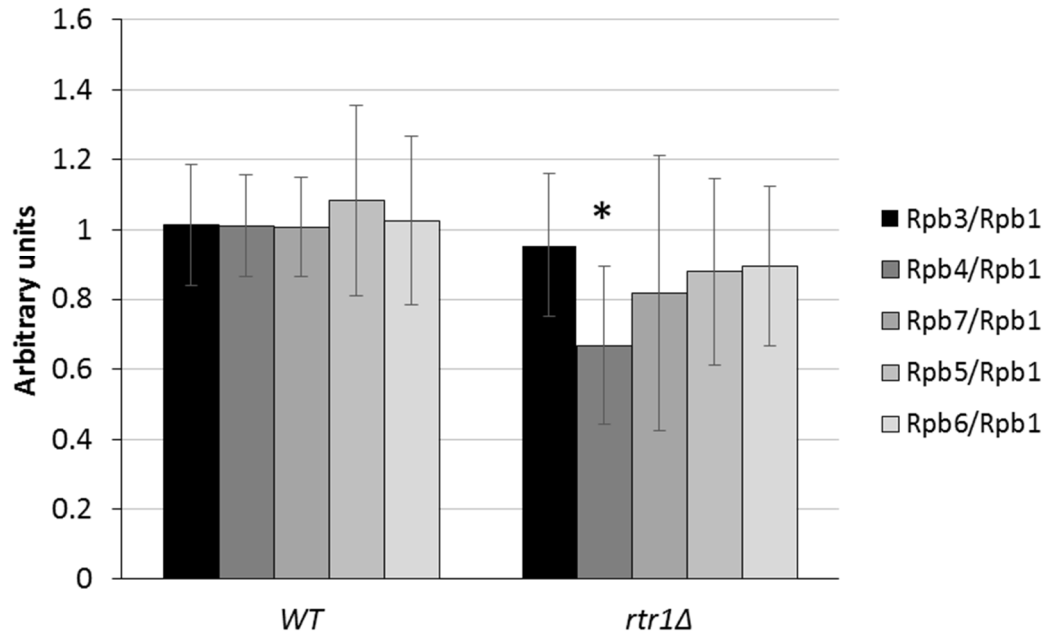

Figure S1

**Figure S1: *RTR1* deletion affects the association of Rpb4 to the RNA pol II engaged in transcription.** The quantification of the western blot for different RNA pol II subunits vs. Rpb1 from chromatin purification, corresponding to the results in Figure 1 for the *rtr1Δ* mutant and wild-type strains. Data are the median and standard deviation of at least three independent biological replicates. \* $p < 0.05$  (t-test).

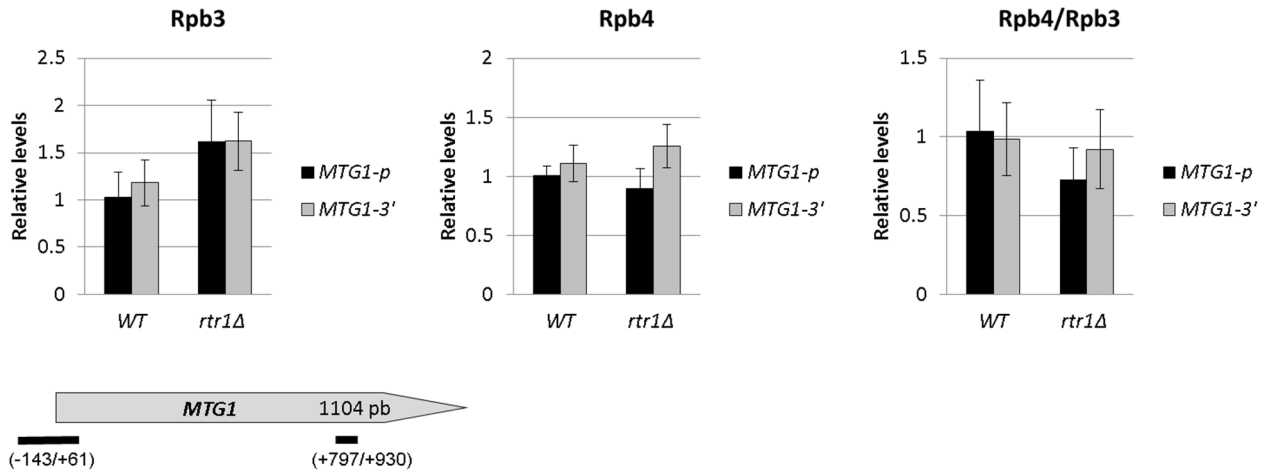

Figure S2

**Figure S2: The *rtr1Δ* mutation affects gene occupancy by RNA pol II, but not global Rpb4 dissociation.** Chromatin immunoprecipitation (ChIP) analysis for the *MTG1* gene in the wild-type and *rtr1Δ* cells performed with anti-Rpb3 (left panel) and anti-Rpb4 (middle panel) antibodies, against Rpb3 and Rpb4 RNA pol II subunits. Right panel: the Rpb4/Rpb3 ratios for the Rpb4 dissociation analysis, from the left and middle panel's results. Lower panel: the transcription unit used in this work indicating the location of the analysed PCR amplicons. The values found for the immunoprecipitated PCR products were compared to those of the total input, and the ratio of each PCR product of the transcribed genes to a non-transcribed region of chromosome V was calculated.

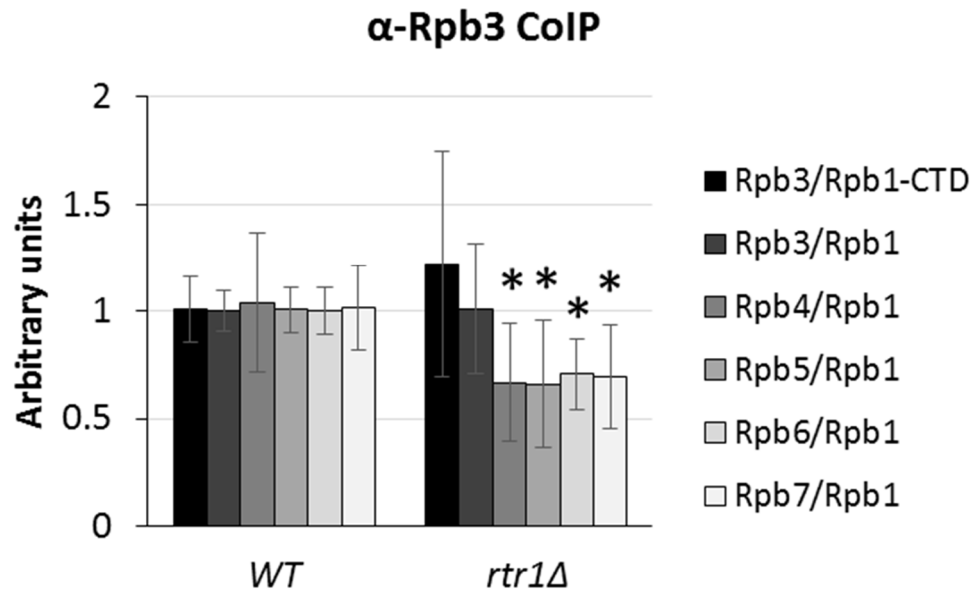

Figure S3

**Figure S3: *RTR1* deletion affects the assembly of RNA pol II.** Quantification of the western blot from the RNA pol II immunoprecipitated from the *rtr1Δ* mutant and wild-type strains, from Figure 4A, showing the ratio for each subunit vs. Rpb1 (y-80). Data are the median and standard deviation of at least three independent biological replicates. \* $p < 0.05$  (t-test).

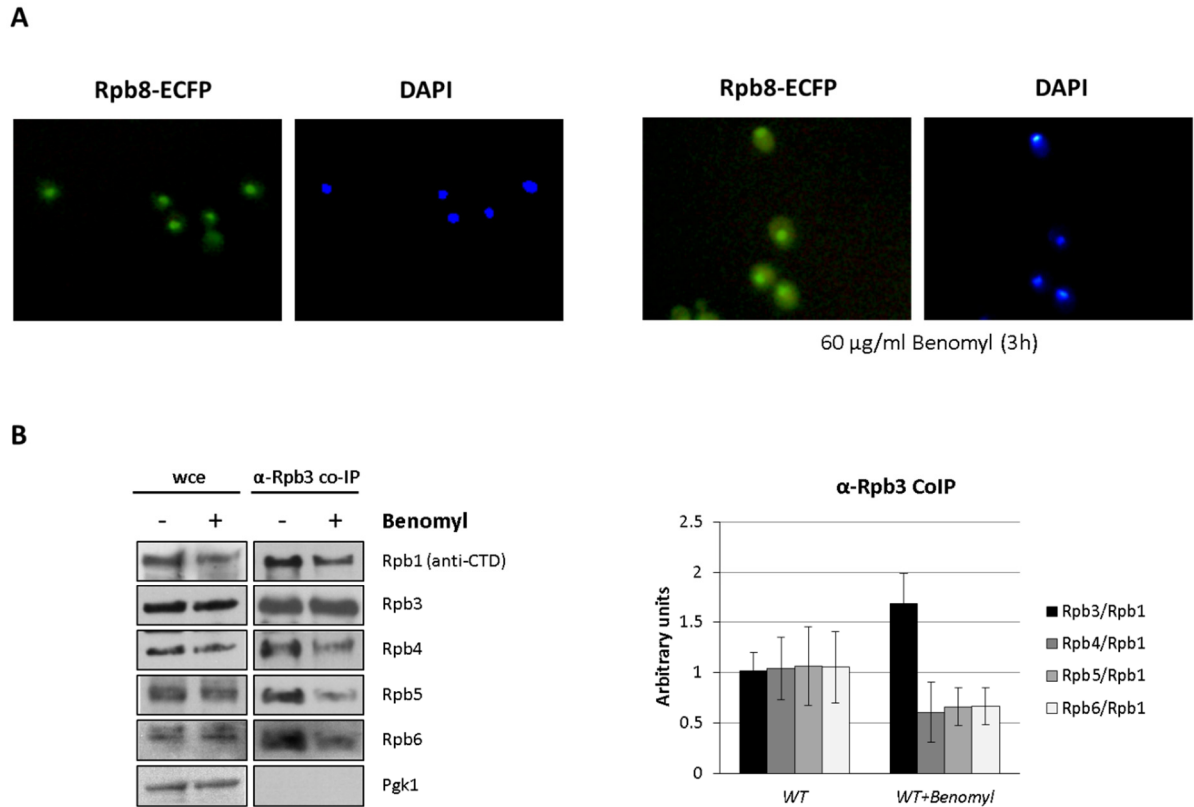

Figure S4

**Figure S4: Analysis of RNA pol II cytoplasmic accumulation.** **A)** Rpb8-ECFP (C-terminal ECFP tagged Rpb8) *in vivo* analysis in wild-type cells grown at 30 °C in YPD and treated with benomyl (60 µg/ml; 3h) shows cytoplasmic Rpb8 accumulation, indicating that nuclear import of RNA pol II is impaired. **B)** RNA pol II immunoprecipitated from a wild-type strain using an anti-Rpb3 antibody, grown in YPD medium at 30°C with and without benomyl treatment (60 µg/ml; 3h). The left panel shows the western blot analysis of subunits Rpb1 (anti-CTD), Rpb3 Rpb4, Rpb5 and Rpb6 of RNA pol II in whole cell extracts, and in the immunoprecipitated samples. Right panel: quantification of western blot for each subunit vs. Rpb1. Pgk1 was tested as a negative control in the RNA pol II purified samples. Graphs represent the median and standard deviation of at least three independent biological replicates.

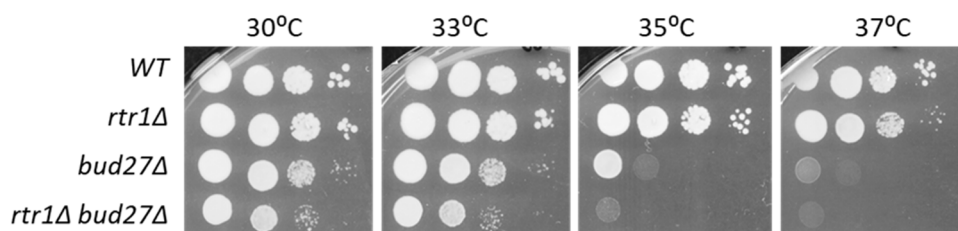

Figure S5

**Figure S5: Analysis of the Rtr1 and Bud27 functional relation.** Genetic interaction of *rtr1Δ* and *bud27Δ* mutants. Growth of single and double mutants in YPD medium at different temperatures.

**Supplementary Table S1. *Saccharomyces cerevisiae* strains**

| Strain   | Genotype                                                                                                            | Origin             |
|----------|---------------------------------------------------------------------------------------------------------------------|--------------------|
| BY4741   | <i>MATa his3-Δ1 leu2-Δ0 met15-Δ0 ura3-Δ0</i>                                                                        | Euroscarf          |
| Y26137   | <i>MATa/MATα his3-Δ1/his3-Δ1 leu2-Δ0/leu2-Δ0 lys2-Δ0/LYS2<br/>MET15/met15-Δ0 ura3-Δ0/ura3-Δ0 rtr1Δ::kanMX4/RTR1</i> | Euroscarf          |
| YFN160   | <i>MATα his3-Δ1 leu2-Δ0 ura3-Δ0 rtr1Δ::KanMX4</i>                                                                   | This work          |
| YFN161   | <i>MATa his3-Δ1 leu2-Δ0 lys2-Δ0 ura3-Δ0 rtr1Δ::KanMX4</i>                                                           | This work          |
| YFN556   | <i>MATa his3-Δ1 leu2-Δ0 ura3-Δ0 rtr1Δ::kanMX4::HIS3</i>                                                             | This work          |
| Y07202   | <i>MATa his3-Δ1 leu2-Δ0 met15-Δ0 ura3-Δ0 trp1Δ::kanMX4</i>                                                          | Euroscarf          |
| YFN756   | <i>MATa his3-Δ1 leu2-Δ0 met15-Δ0 ura3-Δ0 trp1Δ::kanMX4<br/>rtr1Δ::kanMX4::HIS3</i>                                  | This work          |
| YFN416   | <i>MATa his3-Δ1 leu2-Δ0 met15-Δ0 ura3-Δ0 rpb1::GFP::HIS5</i>                                                        | [1]                |
| YFN744   | <i>MATa his3-Δ1 leu2-Δ0 met15-Δ0 ura3-Δ0 rpb1::GFP::HIS5<br/>rtr1Δ::KanMX4</i>                                      | This work          |
| Rpb8-TAP | <i>MATa his3-Δ1 leu2-Δ0 met15-Δ0 ura3-Δ0 rpb8::TAP::HIS3Mx6</i>                                                     | Open<br>Biosystems |
| YFN760   | <i>MATa his3-Δ1 leu2-Δ0 met15-Δ0 ura3-Δ0 rpb8::TAP::HIS3Mx6<br/>rtr1Δ::KanMX4</i>                                   | This work          |
| YFN335   | <i>MATa his3-Δ1 leu2-Δ0 met15-Δ0 ura3-Δ0 lys2-Δ0 rpb8::<br/>ECFP::SpHIS5</i>                                        | [1]                |
| YFN818   | <i>MATa his3-Δ1 leu2-Δ0 met15-Δ0 ura3-Δ0 lys2-Δ0 rpb8::<br/>ECFP::SpHIS5 rtr1Δ::KanMX4</i>                          | This work          |
| YFN106   | <i>MATa his3-Δ1 leu2-3,112 lys2-801 met15-Δ0 trp1-Δ63 ura3-Δ0<br/>bud27Δ::KanMX4</i>                                | [1]                |
| Rtr1-TAP | <i>MATa his3-Δ1 leu2-Δ0 met15-Δ0 ura3-Δ0 rtr1::TAP::HIS3Mx6</i>                                                     | Open<br>Biosystems |
| Y01285   | <i>MATa his3-Δ1 leu2-Δ0 met15-Δ0 ura3-Δ0 rpb4Δ::KanMX4</i>                                                          | Euroscarf          |

|          |                                                                                                                              |                        |
|----------|------------------------------------------------------------------------------------------------------------------------------|------------------------|
| PAY749   | <i>MATa his3-Δ1 leu2-Δ0 met15-Δ0 ura3-Δ0 dhh1::HA::HIS3</i>                                                                  | Gift from Paula Alepuz |
| YFN725   | <i>MATa his3-Δ1 leu2-Δ0 met15-Δ0 ura3-Δ0 dhh1::HA::HIS3<br/>rtr1::TAP::HIS3MX6</i>                                           | This work              |
| YFN756   | <i>MATa his3-Δ1 leu2-Δ0 met15-Δ0 ura3-Δ0 dhh1::HA::HIS3<br/>rtr1::TAP::HIS3MX6 rpb4Δ::KanMX4</i>                             | This work              |
| YFN562   | <i>MATa his3-Δ1 leu2-Δ0 ura3-Δ0 bud27Δ::KanMX4<br/>rtr1Δ::kanMX4::HIS3</i>                                                   | This work              |
| W303     | <i>MATa ade2-1 can1-100 his3-11,15 leu2-3,112 trp1-1 ura3-1</i>                                                              | [2]                    |
| OCSC2115 | <i>MATα ade2-1 can1-100 his3-11,15 leu2-3,112 trp1-1 ura3-1<br/>rpb4Δ::HIS3</i>                                              | Gift from Olga Calvo   |
| YFN567   | <i>MATa ade2-1 can1-100 his3-11,15 leu2-3,112 trp1-1 ura3-1<br/>rtr1Δ::KanMX4</i>                                            | This work              |
| YFN638   | <i>MATa ade2-1 can1-100 his3-11,15 leu2-3,112 trp1-1 ura3-1<br/>rpb4Δ::HIS3 rtr1Δ::KanMX4</i>                                | This work              |
| WY204    | <i>MATα ade2 his3-Δ200 leu2-3,112 lysΔ201 ura3-52<br/>rpb6Δ::HIS3 + pRP674 (CEN LEU2 rpb6Q100R)</i>                          | [3]                    |
| Y25602   | <i>MATa/MATα his3-Δ1/his3-Δ1 leu2-Δ0/leu2-Δ0 lys2-Δ0/LYS2<br/>MET15/met15-Δ0 ura3-Δ0/ura3-Δ0 rpb6Δ::kanMX4/RPB6</i>          | Euroscarf              |
| YFN183   | <i>MATα his3-Δ1 leu2-Δ0 lys2-Δ0 met15-Δ0 ura3-Δ0<br/>rpb6Δ::KanMX4 + pFL44L-RPB6 (2μm URA RPB6)</i>                          | This work              |
| YFN637   | <i>MATα his3-Δ1 leu2-Δ0 lys2-Δ0 met15-Δ0 ura3-Δ0<br/>rpb6Δ::KanMX4 + pRP674 (LEU2 CEN rpb6Q100R)</i>                         | This work              |
| YFN629   | <i>MATα his3-Δ1 leu2-Δ0 lys2-Δ0 met15-Δ0 ura3-Δ0<br/>rtr1Δ::kanMX4::HIS3 rpb6Δ::KanMX4 + pFL44L-RPB6 (2μm<br/>URA RPB6)</i>  | This work              |
| YFN634   | <i>MATα his3-Δ1 leu2-Δ0 lys2-Δ0 met15-Δ0 ura3-Δ0<br/>rtr1Δ::kanMX4::HIS3 rpb6Δ::KanMX4 + pRP674 (CEN LEU2<br/>rpb6Q100R)</i> | This work              |

|        |                                                                                                                                           |           |
|--------|-------------------------------------------------------------------------------------------------------------------------------------------|-----------|
| YFN517 | <i>MATα ade2-1 his3-Δ200 leu2 lys2 trp1-Δ63 ura3-52</i><br><i>rpb7Δ::LEU2 pGEN-RPB7 (2μm TRP1 RPB7)</i>                                   | [4]       |
| yBF32  | <i>MATα ade2-1 his3-Δ200 leu2 lys2 trp1-Δ63 ura3-52</i><br><i>rpb7Δ::LEU2 + pGEN-rpb7-ΔC3 (2μm TRP1 rpb7-ΔC3)</i>                         | [4]       |
| YFN632 | <i>MATα ade2-1 his3-Δ200 leu2 lys2 trp1-Δ63 ura3-52</i><br><i>rpb7Δ::LEU2 pGEN-RPB7 (2μm TRP1 RPB7) rtr1Δ::KanMX4</i>                     | This work |
| YFN633 | <i>MATα ade2-1 his3-Δ200 leu2 lys2 trp1-Δ63 ura3-52</i><br><i>rpb7Δ::LEU2 + pGEN-rpb7-ΔC3 (2μm TRP1 rpb7-ΔC3)</i><br><i>rtr1Δ::KanMX4</i> | This work |



**Supplementary Table S2. Plasmids used**

| Name                    | Yeast markers and ORI                  | Origin    |
|-------------------------|----------------------------------------|-----------|
| M4754                   | <i>KanMX::HIS3</i> disruptor converter | [5]       |
| pCM189                  | ORI (CEN) <i>URA3</i>                  | [6]       |
| pCM189- <i>RPB4</i>     | ORI (CEN) <i>URA3</i>                  | [7]       |
| pCM189- <i>RPB6</i>     | ORI (CEN) <i>URA3</i>                  | This work |
| pGEN                    | ORI (2μm) <i>TRP1</i>                  | [8]       |
| pGEN- <i>RPB7</i>       | ORI (2μm) <i>TRP1</i>                  | [9]       |
| pRS313-GFP- <i>RPB4</i> | ORI (CEN) <i>HIS3</i>                  | [10]      |

**Supplementary Table S3. Oligonucleotides used**

| Gene (or DNA region)                | Primer                | Sequence                     |
|-------------------------------------|-----------------------|------------------------------|
| Intergenic region<br>(chromosome V) | IntergChrV-F          | TGTTTCCTTTAAGAGGTGATGGTGAT   |
|                                     | IntergChrV-R          | GTGCGCAGTACTTGTGAAAACC       |
| <i>18S rDNA</i>                     | 18S-501               | CATGGCCGTTCTTAGTTGGT         |
|                                     | 18S-301               | ATTGCCTCAAACCTCCATCG         |
| <i>ACT1</i>                         | <i>ACT1</i> -501      | GCCTTCTACGTTTCCATCCA         |
|                                     | <i>ACT1</i> -301      | GGCCAAATCGATTCTCAAAA         |
| <i>GAL1</i>                         | <i>GAL1</i> -501      | TGGTGTTAACAATGGCGGTA         |
|                                     | <i>GAL1</i> -301      | GGGCGGTTTCAAACCTTGTA         |
| <i>GAL10</i>                        | <i>GAL10</i> -501     | ACGGAGATTATGGTGCGTTC         |
|                                     | <i>GAL10</i> -301     | GGATTTTGGGGCCTAAGAC          |
| <i>HHT1</i>                         | <i>HHT1</i> -501      | TGCCTTTCCAAAGATTGGTC         |
|                                     | <i>HHT1</i> -301      | TTGGATAGTGACACGCTTGG         |
| <i>MTG1</i> (-143/+61 pb)           | <i>MTG1</i> -503      | TCAAAGAACACGGACCATCA         |
|                                     | <i>MTG1</i> -303      | TTGGTGTGAAGGATGAAACG         |
| <i>MTG1</i> (+797/+930 pb)          | <i>MTG1</i> -502      | TGCAAAATTTGAACGATGGA         |
|                                     | <i>MTG1</i> -301      | CCACTCGATAGCCGTTGATT         |
| <i>PMAl</i> (-330/-234 pb)          | <i>PMAlp</i> -503     | AAAGGCCAAATATTGTATTATTTCAA   |
|                                     | <i>PMAlp</i> -302     | TTGGTGTATAGGAAAGAAAGAGAAA    |
| <i>PMAl</i> (+9/+116 pb)            | <i>PMAl</i> -5'-501   | ACATCATCCTCTTCATCATCCTC      |
|                                     | <i>PMAl</i> -5'-301   | TCAGAAGATTCAGATGCAGCG        |
| <i>PMAl</i> (+1367/+1532 pb)        | <i>PMAl</i> -504      | GAAGGTTACTGCCGTTGTCG         |
|                                     | <i>PMAl</i> -304      | CGGAACCCTCTAGAAGCCAA         |
| <i>PMAl</i> (+2551/+2757 pb)        | <i>PMAl</i> -6 (forw) | ATATTGTTACTGTCGTCGTCGTCTGGAT |
|                                     | <i>PMAl</i> -6 (rev)  | ATTAGGTTTCCTTTTCGTGTTGAGTAGA |

|                              |                       |                                          |
|------------------------------|-----------------------|------------------------------------------|
| <i>PYK1</i> (-37/+52 pb)     | <i>PYK1p</i> -502     | ACAAGACACCAATCAAAACAAA                   |
|                              | <i>PYK1p</i> -301     | AGTCAGAACCAGCAACAACG                     |
| <i>PYK1</i> (+254/+352 pb)   | <i>PYK1</i> -504      | CCAAGGGTCCAGAAATCAGA                     |
|                              | <i>PYK1</i> -304      | CGTACTTGTCATCGGTGGTG                     |
| <i>PYK1</i> (+769/+950 pb)   | <i>PYK1</i> -503      | CTGACGGTGTTATGGTTGCC                     |
|                              | <i>PYK1</i> -303      | TCGGAAACTTCAGCTCTGGT                     |
| <i>PYK1</i> (+1039/+1288pb)  | <i>PYK1</i> -4 (forw) | CTATGGCTGAAACCGCTGTCATTG                 |
|                              | <i>PYK1</i> -4 (rev)  | CAGCTCTTGGGCATCTGGTAAC                   |
| <i>RPB4</i>                  | <i>RPB4</i> -502      | TGCTTGCAATGGTTCAGAAG                     |
|                              | <i>RPB4</i> -301      | CCATTTTTGGTCGAATTTTG                     |
| <i>RTR1</i>                  | <i>RTR1</i> -501      | TCCGATATTTTTGTCCGAAATAGG                 |
|                              | <i>RTR1</i> -301      | GACTCAAAGTGAATTATAGCAAAG                 |
| <i>URA2</i> (-123/+63 pb)    | <i>URA2p</i> -501     | ATATCGGCATCTGGCTTGAA                     |
|                              | <i>URA2p</i> -301     | CAGACGGTCACCCGTAGATT                     |
| <i>URA2</i> (+618/+746 pb)   | <i>URA2</i> -503      | GTACGTCCTCCAGCAGACA                      |
|                              | <i>URA2</i> -303      | ACACCCCTTTTGATAAAACAACG                  |
| <i>URA2</i> (+2988/+3213 pb) | <i>URA2</i> -501      | CGAATTTGATTGGTGTGCTG                     |
|                              | <i>URA2</i> -301      | GGCGATGTTGTTGGAAGTTT                     |
| <i>URA2</i> (+6060/+6448 pb) | <i>URA2</i> -502      | CGCCGCTAAATATTCTCCTG                     |
|                              | <i>URA2</i> -302      | CAATTCCGGAGGAGAAACAA                     |
| 5'-Cy3 labelled probe        | oligodTCy3            | TTTTTTTTTTTTTTTTTTTTTTTTTTTTTTTTTTTTTTTT |

The primers used were as follows (all 5'-3')

1. Mirón-García, M.C.; Garrido-Godino, A.I.; García-Molinero, V.; Hernández-Torres, F.; Rodríguez-Navarro, S.; Navarro, F. The prefoldin Bud27 mediates the assembly of the eukaryotic RNA polymerases in an Rpb5-dependent manner. *PLoS Genet.* **2013**, *9*, e1003297.
2. Thomas, B.J.; Rothstein, R. Elevated recombination rates in transcriptionally active DNA. *Cell* **1989**, *56*, 619–630.
3. Tan, Q.; Prysak, M.H.; Woychik, N.A. Loss of the Rpb4/Rpb7 subcomplex in a mutant form of the Rpb6 subunit shared by RNA polymerases I, II, and III. *Mol. Cell. Biol.* **2003**, *23*, 3329–3338.
4. Allepuz-Fuster, P.; Martínez-Fernández, V.; Garrido-Godino, A.I.; Alonso-Aguado, S.; Hanes, S.D.; Navarro, F.; Calvo, O. Rpb4/7 facilitates RNA polymerase II CTD dephosphorylation. *Nucleic. Acids. Res.* **2014**, *42*, 13674–13688.
5. Voth, W.P.; Jiang, Y.W.; Stillman, D.J. New ‘marker swap’ plasmids for converting selectable markers on budding yeast gene disruptions and plasmids. *Yeast* **2003**, *20*, 985–93.
6. Gari, E.; Piedrafita, L.; Aldea, M.; Herrero, E. A set of vectors with a tetracycline-regulatable promoter system for modulated gene expression in *Saccharomyces cerevisiae*. *Yeast* **1997**, *13*, (9), 837–48.
7. Garrido-Godino, A.I.; García-López, M.C.; García-Martínez, J.; Pelechano, V.; Medina, D.A.; Pérez-Ortín, J.E.; Navarro, F. Rpb1 foot mutations demonstrate a major role of Rpb4 in mRNA stability during stress situations in yeast. *Biochim. Biophys. Acta* **2016**, *1859*, 731–743.
8. Shpakovski, G.V.; Acker, J.; Wintzerith, M.; Lacroix, J.F.; Thuriaux, P.; Vigneron, M. Four subunits that are shared by the three classes of RNA polymerase are functionally interchangeable between *Homo sapiens* and *Saccharomyces cerevisiae*. *Mol. Cell. Biol.* **1995**, *15*, 4702–4710.
9. Zaros, C.; Thuriaux, P. Rpc25, a conserved RNA polymerase III subunit, is critical for transcription initiation. *Mol. Microbiol.* **2005**, *55*, 104–114.
10. Lotan, R.; Bar-On, V.G.; Harel-Sharvit, L.; Duek, L.; Melamed, D.; Choder, M. The RNA polymerase II subunit Rpb4p mediates decay of a specific class of mRNAs. *Genes Dev.* **2005**, *19*, 3004–3016.
